# Supplementary material for: Investigation of neomycin biodegradation conditions using ericoid mycorrhizal and white rot fungal species
Source: Research Square preprint supplement (doi:10.21203/rs.3.rs-1821027/v1), 2022-07-12
Supplement: Supplementary file 4 [file a5fe71db2384d1bab947b1b7.docx]

| **Appendix 4** | |  |  |  |  |  |  |
| --- | --- | --- | --- | --- | --- | --- | --- |
|  |  |  |  |  |  |  |  |
|  | **Table 7** Summary of kinetic parameters of degradation of neomycin using different experimental conditions | | | | | | | |
